# Supplementary material for: Cathode interfacial layer-free all small-molecule solar cells with efficiency over 12%
Source: Royal Society of Chemistry journal article supplement (doi:10.1039/c9ta05023j), 2019-01-01
Supplement: c9ta05023j1.pdf [file c9ta05023j1.pdf]

## Supporting Information

### Cathode Interfacial Layer-Free All Small-Molecule Solar Cells with Efficiency over 12%

Hao Wu, †<sup>ab</sup> Qihui Yue, †<sup>ab</sup> Zichun Zhou,<sup>ab</sup> Shanshan Chen,<sup>cd</sup> Dongyang Zhang,<sup>e</sup> Shengjie Xu,<sup>a</sup> Huiqiong Zhou,<sup>e</sup> Changduk Yang,<sup>c</sup> Haijun Fan<sup>\*a</sup> and Xiaozhang Zhu<sup>\*ab</sup>

<sup>a</sup>Beijing National Laboratory for Molecular Sciences, CAS Key Laboratory of Organic Solids, Institute of Chemistry, Chinese Academy of Sciences, Beijing 100190, China

<sup>b</sup>Department of Chemical Sciences, University of Chinese Academy of Sciences, Beijing 100049, China

<sup>c</sup>Department of Energy Engineering, School of Energy and Chemical Engineering, Low Dimensional Carbon Materials Center, Ulsan National Institute of Science and technology (UNIST), Ulsan 689-798, South Korea

<sup>d</sup>MOE Key Laboratory of Low-grade Energy Utilization Technologies and Systems, School of Energy & Power Engineering, Chongqing University, Chongqing 400044, China

<sup>e</sup>CAS Key Laboratory of Nanosystem and Hierarchical Fabrication, CAS Center for Excellence in Nanoscience, National Center for Nanoscience and Technology, Beijing 100190, China

† H. W. and Q. Y. contributed equally to this work.

E-mails: fanhai2008@iccas.ac.cn; xzzhu@iccas.ac.cn

### Materials

Unless otherwise stated, all starting materials were purchased from Innochem or Energy Chemicals, which were used without further purification. The reactions referred to air- or moisture-sensitive compounds were carried out in a dry reaction vessel under N<sub>2</sub>. Molecular donor BDT3TR-SF,<sup>[1]</sup> molecular acceptor NBDTP-F<sub>out</sub><sup>[1]</sup> and the related intermediates<sup>[2]</sup> for BSFTR (see Scheme S1), were synthesized according to the reported procedures.

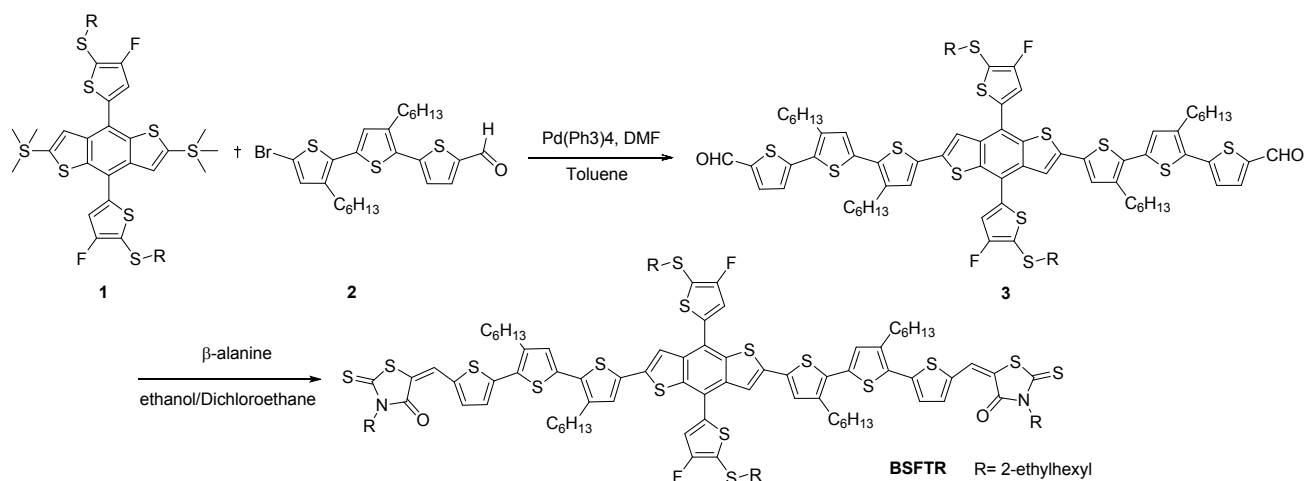

**Scheme 1.** Synthesis of molecular donor BSFTR.

**Compound BSFTR:** Compound 3 (100mg, 0.062 mmol) were dissolved in CH<sub>2</sub>CH<sub>2</sub>Cl<sub>2</sub>:ethanol (6 mL:3mL) and 15 mg  $\beta$ -alanine was added to was added to start the reaction. The reaction was carried out for 36 h at 75 °C. The mixture was quenched with water and then extracted by CHCl<sub>3</sub>. The compound BSFTR was obtained as a solid (113mg, 90%) after being concentrated under reduced pressure and purified by silica-gel column chromatography with using CHCl<sub>3</sub> as the eluent. <sup>1</sup>H NMR (300 MHz, CDCl<sub>3</sub>):  $\delta$  7.79 (s, 2H), 7.516 (s, 2H), 7.32 (d, J=4Hz, 2H), 7.22 (m, 4H), 7.18 (d, J=4Hz, 2H), 7.09(s, 2H), 7.00(s, 2H) 4.01(d, J=7.2, 4H), 2.95 (d, J=6.0Hz, 4H), 2.82-2.74 (m, 8H), 2.08-2.05 (m, 2H), 1.71-0.917 (m, 100H). <sup>13</sup>C NMR (151 MHz, CDCl<sub>3</sub>)  $\delta$  192.50, 167.96, 159.62, 157.88, 144.12, 141.89, 140.99, 139.17, 139.11, 138.44, 138.37, 137.12, 137.06, 135.32, 134.58, 134.54, 131.24, 129.96, 129.12, 128.78, 126.46, 124.87, 122.34, 120.11, 117.95, 115.15, 115.01, 48.74, 42.83, 39.41, 37.02, 32.03, 31.74, 31.70, 30.53, 30.31, 29.93, 29.79, 29.73, 29.40, 29.37, 28.80, 28.48, 25.34, 23.94, 23.02, 22.99, 22.71, 22.67, 14.21, 14.18, 14.09, 10.95, 10.57, 0.02. HRMS (MALDI-TOF) Calcd for C<sub>106</sub>H<sub>134</sub>F<sub>2</sub>N<sub>2</sub>O<sub>2</sub>S<sub>16</sub> [M]<sup>+</sup>: 2016.5925; Found: 2016.5939.

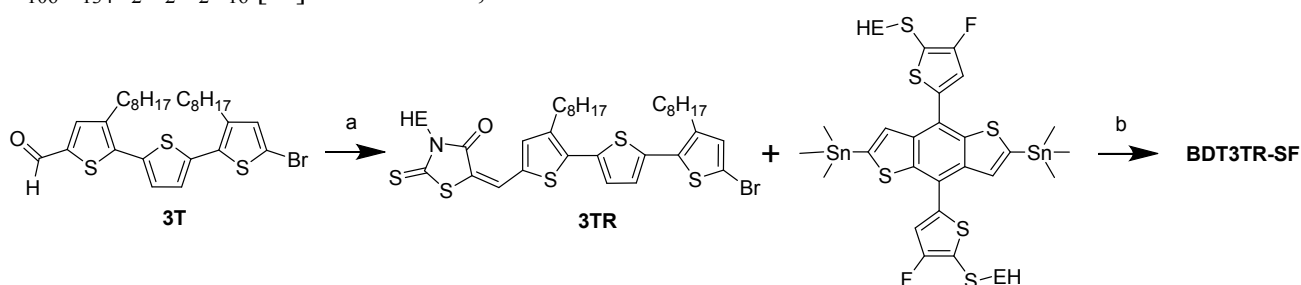

**Scheme 2.** Synthesis of molecular donor BDT3TR-SF.<sup>[1]</sup> Reagents and conditions: (a) 3-(2-ethylhexyl)-2-thioxothiazolidin-4-one,  $\beta$ -alanine ethanol/ dichloroethane; (b) Pd(PPh<sub>3</sub>)<sub>4</sub>, Toluene/DMF.

**Compound BDT3TR-SF:** To the mixture of compound 3TR (5-((5"-bromo-3,3"-dioctyl-[2,2':5',2"-terthiophen]-5-yl)methylene)-3-(2-ethylhexyl)-2-thioxothiazolidin-4-one) (185 mg, 0.229 mmol) and (4,8-bis(5-((2-ethylhexyl)thio)-4-fluorothiophen-2-yl)benzo[1,2-*b*:4,5-*b'*']dithiophene-2,6-diyl)bis(trimethylstannane) (0.1 g, 0.0995 mmol), Pd(PPh<sub>3</sub>)<sub>4</sub> (12 mg, 0.01 mmol) in toluene (4 mL) and DMF (1ml) was added in nitrogen, which was deoxidized by bubbling with nitrogen for 15 min. The solution was refluxed for 24 h. After quenching the reaction with water, the product was extracted with CHCl<sub>3</sub>. The CHCl<sub>3</sub> solution was then washed with KF (aq.), condensed under the reduced pressure, and purified by silica-gel column chromatography using CHCl<sub>3</sub> as an eluent to afford BDT3TR-SF as a black solid (90 mg, 43%). <sup>1</sup>H NMR(300MHz, CDCl<sub>3</sub>):  $\delta$  7.76 (s, 2H), 7.56 (s, 2H), 7.23 (s, 6H), 7.15-7.14 (m, 4H), 4.02 (d, J=7.1Hz, 4H), 2.94 (d, J=6.1Hz, 4H), 2.88-2.64 (m, 8H), 2.08-1.97 (m, 4H), 1.71-1.64 (m, 8H), 1.43-0.82 (m, 108H).

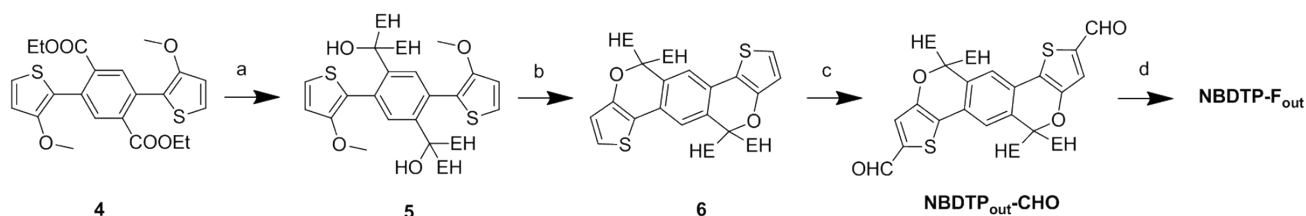

**Scheme 3.** Synthesis of molecular acceptor NBDTP-F<sub>out</sub>.<sup>[1]</sup> Reagents and conditions: (a) 2-ethylhexyllithium, THF; (b) TsOH, THF/H<sub>2</sub>O; (c) POCl<sub>3</sub>, DMF; (d) 2-(6-fluoro-3-oxo-2,3-dihydro-1H-inden-1-ylidene) malononitrile, Piperidine, CHCl<sub>3</sub>

**Compound NBDTP- $F_{out}$ :** Compound NBDTP<sub>out</sub>-CHO (70 mg, 0.0872 mmol) and 2-(5-fluoro-3-oxo-2,3-dihydro-1*H*-inden-1*B*-ylidene) malononitrile (93 mg, 0.436 mmol) were dissolved in CHCl<sub>3</sub> (6 mL) and pyridine (0.1 mL). The reaction was carried out under N<sub>2</sub> atmosphere at room temperature for 12 h. The mixture was precipitated with water and then extracted with CHCl<sub>3</sub>. The organic phase was concentrated under reduced pressure and purified on a silica-gel column chromatography with using CHCl<sub>3</sub> as the eluent, which produced 70 mg NBDTP- $F_{out}$  (blue solid, yield: 70%). <sup>1</sup>H NMR (300 MHz, CDCl<sub>3</sub>): δ 8.75-8.71 (m, 2.5H), 8.4-8.37 (m, 1.5H), 7.96-7.92 (m, 1.5H), 7.58 (m, 0.5H), 7.45-7.40 (m, 4H), 7.15(s, 2H), 2.00-1.92 (m, 8H), 1.54-1.50 (m, 4H), 1.25-0.81 (m, 56H).

## Instruments

BRUKER Avance III 400 or 300 HD spectrometer was employed to measure <sup>1</sup>H NMR and <sup>13</sup>C NMR spectra. MALDI-TOF measurements were performed on an Applied Biosystems 4700 Proteomics Analyzer. UV-vis spectra were recorded by a JASCO V-570 spectrometer. Cyclic voltammetry (CV) measurements calibrated under N<sub>2</sub> with ferrocene/ferrocenium (F<sub>c</sub>/F<sub>c</sub><sup>+</sup>) were carried out in an anhydrous CH<sub>3</sub>CN solution with 0.1 M tetrabutylammonium perchlorate (TBAP) supporting electrolyte utilizing a CHI640C analyzer with a scan rate of 100 mV/s, which uses glassy-carbon as the working electrode, platinum-wire as the counter electrode, and Ag/Ag<sup>+</sup> as the reference electrode.. The HOMO/LUMO was calculated by equation:  $E_{HOMO/LUMO} = - (4.8 + E_{ox/red} - E_{Fc/Fc+})$  eV. Thermogravimetric analysis (TGA) was carried out on a Shimadzu DTG 60 instrument at a heating rate of 10 °C min<sup>-1</sup> under a N<sub>2</sub> atmosphere recording from 30 °C to 450 °C.

## Device Fabrication and Characterization

Organic photovoltaic devices were fabricated with a conventional structure of ITO/PEDOT:PSS/active layer/PDINO/Al. ITO-coated glass substrates (15 Ω sq<sup>-1</sup>) were cleaned by sequential ultrasonication in soap deionized water, deionized water, acetone, and isopropanol. The washed substrates were further treated with oxygen plasma for 20 min to eliminate any remaining organic component. A thin layer (ca. 30 nm) of PEDOT:PSS was first spin-coated on the ITO substrates at 4000 rpm and baked at 150 °C for 30 min in air. The substrates were then transferred into a nitrogen-filled glovebox. Subsequently, the active layer was spin-coated on the PEDOT:PSS layer from a chloroform solution with 11.25 mg ml<sup>-1</sup> BSFTR (or BDT3TR-SF) and 9 mg ml<sup>-1</sup> BODT-Fout at various spin rates. The resulting film thickness was measured via a surface profilometer (Dektak XT, Bruker). Here, solvent vapor annealing (SVA) was used to optimize the blend morphology and promote device performance. Then, 1 mg ml<sup>-1</sup> PDINO in methanol was spin-coated on the active layer at 3000 rpm. At the final stage, aluminum (100 nm) was thermally evaporated onto the active layer as the top electrode. Shadow masks were used to define the OSC active area (0.05 cm<sup>2</sup>) of the devices. The current density–voltage (*J*–*V*) characteristics of photovoltaic devices were measured under N<sub>2</sub> using a Keithley 2400 source meter. A 300 W xenon arc solar simulator (Oriel) with an AM 1.5 global filter operated at 100 mW cm<sup>-2</sup> was used to simulate the AM 1.5G solar irradiation. The illumination intensity was corrected by using a silicon photodiode with a protective KG5 filter calibrated by the National Renewable Energy Laboratory (NREL). The external quantum efficiency (EQE) was performed using certified IPCE equipment from Enlitech, Taiwan.

## AFM and TEM

Atomic force microscopy (AFM) were performed on a NanoscopeIIIa AFM (Digital Instruments) operating in tapping mode. Transmission electron microscopy (TEM) images of the thin films was obtained using a JEOL 2200FS instrument at 160 kV accelerating voltage.

## GIWAXS

PLS-II 9A USAXS beam line was employed to perform Grazing incidence X-ray scattering (GIWAXS) characterization of the thin films. X-rays coming from the in-vacuum undulator (IVU) were monochromated (wavelength  $\lambda = 1.109\ 94\ \text{\AA}$ ) using a double crystal monochromator and focused both horizontally and vertically ( $450\ (\text{H}) \times 60\ (\text{V})\ \mu\text{m}^2$  in fwhm at sample position) using K-B type mirrors. GIWAXS patterns were recorded with a 2D CCD detector (Rayonix SX165), and X-ray irradiation time was 6-9 s, dependent on the saturation level of the detector. Diffraction angles were calibrated using a sucrose standard (monoclinic, P21,  $a = 10.8631\ \text{\AA}$ ,  $b = 8.7044\ \text{\AA}$ ,  $c = 7.7624\ \text{\AA}$ ,  $\beta = 102.938\ \text{\AA}$ ) and the sample-to-detector distance was  $\sim 231\ \text{mm}$ .

## TPC and TPV Measurement

Transient photocurrent (TPC) and photovoltage (TPV) were measured by applying a 488 nm solid state laser (Coherent OBIS CORE 488LS) with a pulse width of  $\sim 30\ \text{ns}$ . The current traces were recorded using a mixed domain oscilloscope (Tektronix MDO3032) by measuring the voltage drop across a  $2\ \Omega$  resistor load connected in series with the solar cell. TPV measurements were performed by using the same laser pulse as for TPC at open-circuit condition. The photovoltage traces were recorded by the oscilloscope with an external  $10\ \text{M}\Omega$  resistor in series.

## Charge Carrier Mobility

Space charge-limited currents were tested in electron-only devices with a configuration of ITO/ZnO/active layer/PFN/Al and hole-only devices with a configuration of ITO/PEDOT:PSS/active layer/Au. The mobilities were determined by fitting the dark current to the model of a single carrier SCLC current with field dependent mobility, which is described as:

$$J = \frac{9\varepsilon_0\varepsilon_r\mu_0V^2}{8L^3}$$

where  $J$  is the current,  $\mu_0$  is the zero-field mobility,  $\varepsilon_0$  is the permittivity of free space,  $\varepsilon_r$  is the relative permittivity of the material,  $V$  is the effective voltage, and  $L$  is the thickness of the active layer. From the plots of  $J^{0.5}$  vs  $V$ , hole and electron mobilities can be deduced.

**Table S1.** Physical, Electronic, and Optical Properties of BSFTR and NBDTP-F<sub>out</sub>

| Materials              | $\lambda_{\text{sol}}^{\text{max}}$<br>[nm] | $\lambda_{\text{film}}^{\text{max}}$<br>[nm] | $\epsilon^{\text{max}}$<br>[M <sup>-1</sup> cm <sup>-1</sup> ] | $E_{\text{g}}^{\text{opt}}$<br>[eV] <sup>a</sup> | $E_{\text{HOMO}}$<br>[eV] | $E_{\text{LUMO}}$<br>[eV] | $E_{\text{g}}^{\text{cv}}$<br>[eV] <sup>b</sup> |
|------------------------|---------------------------------------------|----------------------------------------------|----------------------------------------------------------------|--------------------------------------------------|---------------------------|---------------------------|-------------------------------------------------|
| NBDTP-F <sub>out</sub> | 720                                         | 802                                          | $2.5 \times 10^5$                                              | 1.41                                             | -5.45                     | -4.00                     | 1.45                                            |
| BSFTR                  | 516                                         | 570                                          | $1.8 \times 10^5$                                              | 1.83                                             | -5.28                     | -3.19                     | 2.09                                            |

<sup>a</sup>)  $E_{\text{g}}^{\text{opt}} = 1240/\lambda_{\text{abs}}^{\text{onset}}$ . <sup>b</sup>)  $E_{\text{g}}^{\text{cv}} = E_{\text{LUMO}} - E_{\text{HOMO}}$ .

**Table S2.** The photovoltaic parameters for devices based on BSFTR:NBDTP-F<sub>out</sub> with different D:A ratios, measured under AM 1.5G, 100 mW cm<sup>-2</sup>.

| D:A   | $V_{\text{oc}}$<br>[V] | $J_{\text{sc}}$<br>[mA cm <sup>-2</sup> ] | FF<br>[%] | PCE<br>[%]         |
|-------|------------------------|-------------------------------------------|-----------|--------------------|
| 1:0.8 | 0.796                  | 21.00                                     | 71.62     | 11.97 (11.74±0.17) |
| 1:1   | 0.798                  | 20.69                                     | 70.33     | 11.61 (11.49±0.15) |
| 1:1.2 | 0.795                  | 19.24                                     | 69.96     | 10.71(10.60±0.13)  |

**Table S3.** The photovoltaic parameters for devices based on BSFTR:NBDTP-F<sub>out</sub> of 1:0.8 weight ratio with different SVA time, measured under AM 1.5G, 100 mW cm<sup>-2</sup>.

| SVA Time | $V_{\text{oc}}$<br>[V] | $J_{\text{sc}}$<br>[mA cm <sup>-2</sup> ] | FF<br>[%] | PCE<br>[%]         |
|----------|------------------------|-------------------------------------------|-----------|--------------------|
| CF 0s    | 0.863                  | 9.58                                      | 42.40     | 3.51 (3.38±0.17)   |
| CF 20s   | 0.828                  | 19.08                                     | 62.12     | 9.81 (9.67±0.12)   |
| CF 40s   | 0.810                  | 20.73                                     | 68.60     | 11.52 (11.41±0.13) |
| CF 60s   | 0.796                  | 21.00                                     | 71.62     | 11.97 (11.74±0.17) |
| CF 80s   | 0.780                  | 21.60                                     | 69.53     | 11.70 (11.59±0.11) |

**Table S4.** The photovoltaic parameters for BSFTR:NBDTP-F<sub>out</sub> devices of different active layer thicknesses, measured under AM 1.5G, 100 mW cm<sup>-2</sup>.

| Thickness<br>[nm] | $V_{\text{oc}}$<br>[V] | $J_{\text{sc}}$<br>[mA cm <sup>-2</sup> ] | FF<br>[%] | PCE<br>[%]         |
|-------------------|------------------------|-------------------------------------------|-----------|--------------------|
| 95                | 0.797                  | 20.85                                     | 71.30     | 11.84 (11.69±0.10) |
| 120               | 0.796                  | 21.00                                     | 71.62     | 11.97 (11.74±0.17) |
| 150               | 0.792                  | 22.02                                     | 68.09     | 11.88 (11.67±0.15) |

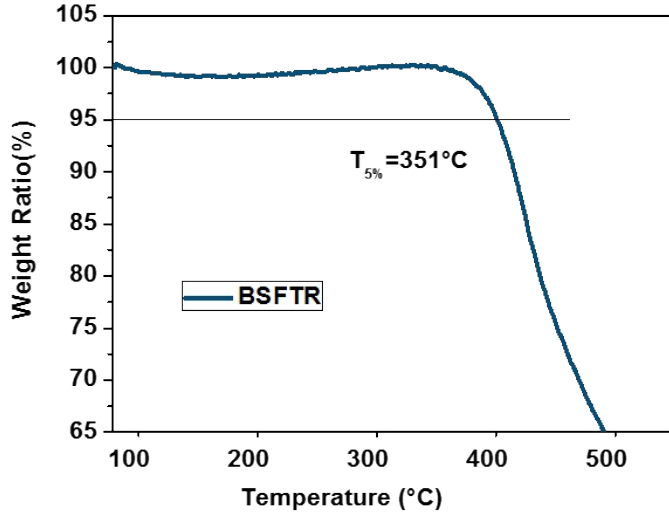

**Figure S1** Thermal gravimetric analysis (TGA) curve of BSFTR.

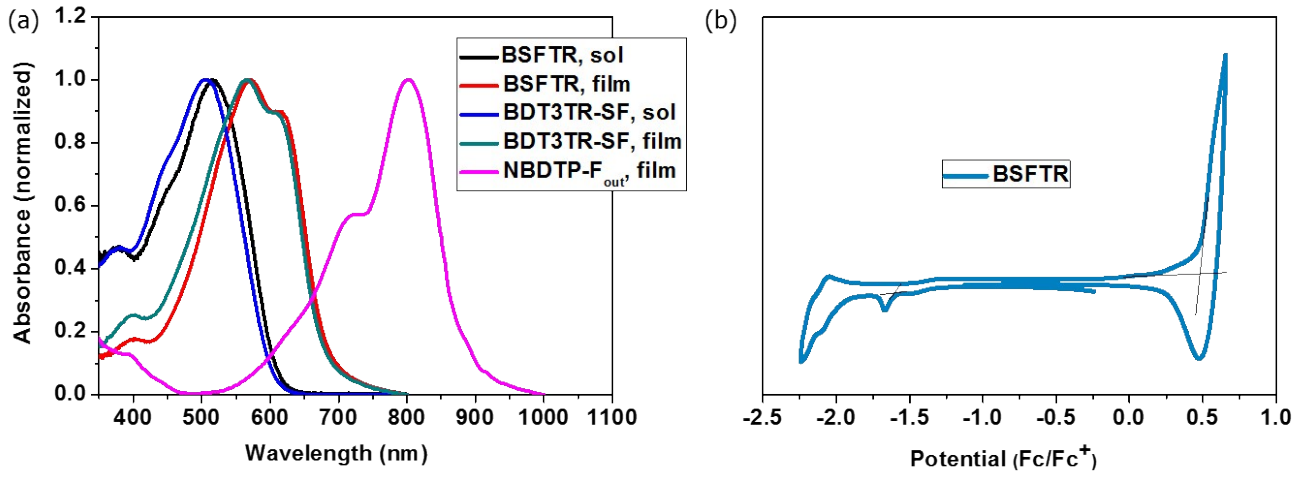

**Figure S2** a) Absorption spectrum of BSFTR, BDT3TR-SF, and NBDTP-F<sub>out</sub> in solution and film states. b) Cyclic voltammetry curve of BSFTR.

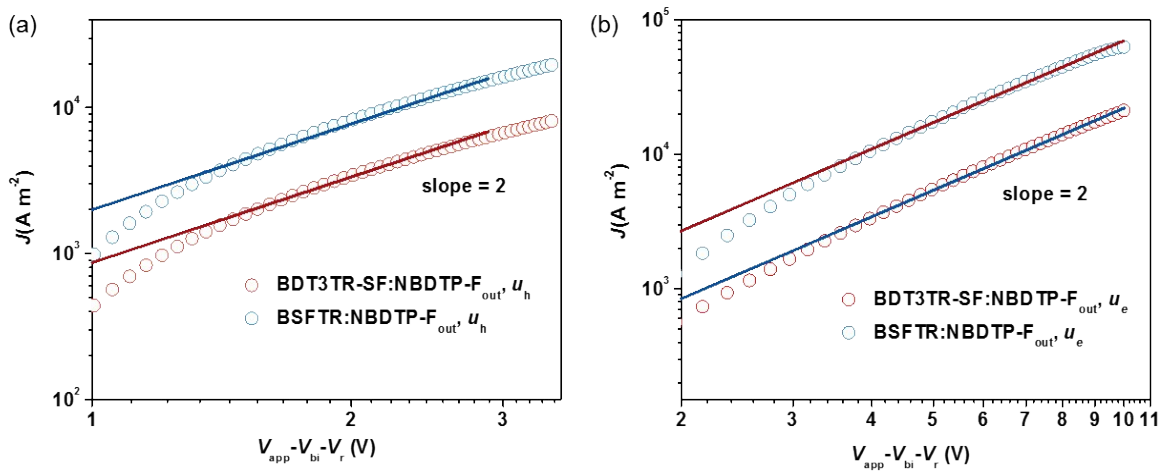

**Figure S3** SCLC mobility of BDT3TR-SF:NBDTP-F<sub>out</sub> and BSFTR:NBDTP-F<sub>out</sub> film.

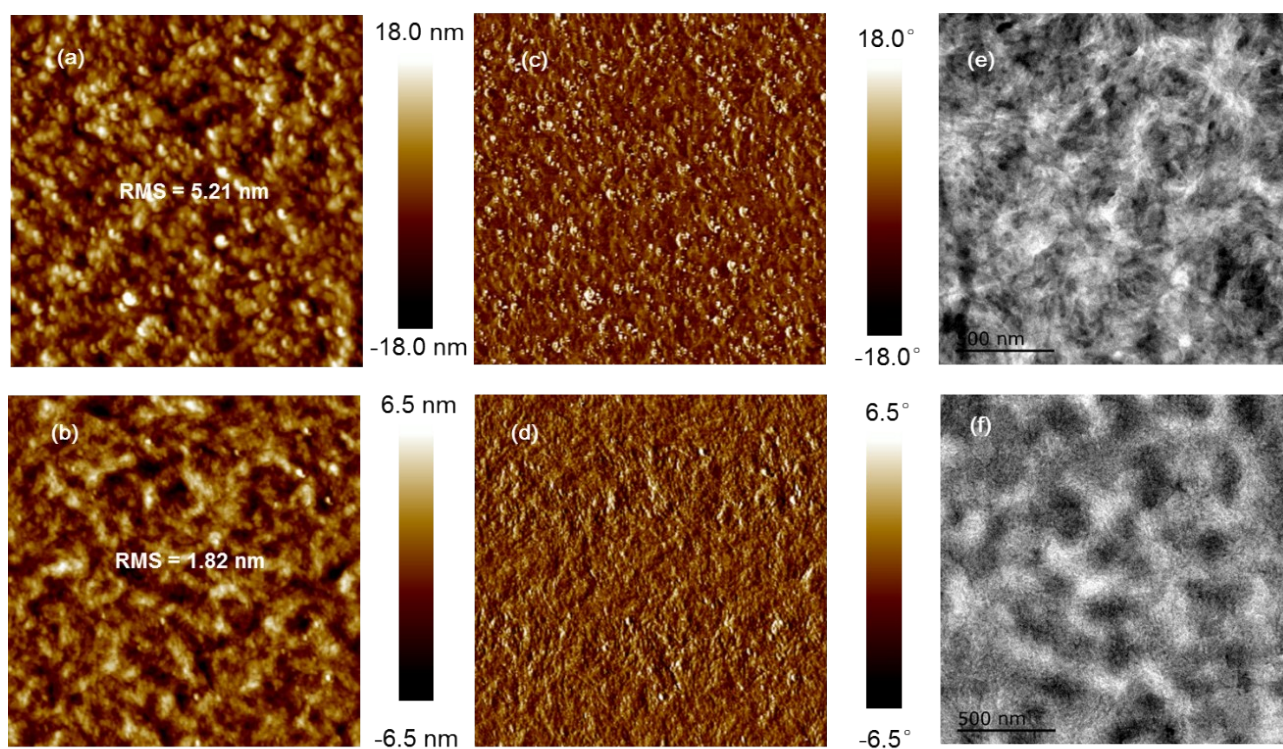

**Figure S4** AFM height, phase, and TEM images of BDT3TR-SF:NBDTP-F<sub>out</sub> (a, c, e) and the BSFTR:NBDTP-F<sub>out</sub> (b, d, f) blends.

# NMR Charts

## BSFTR

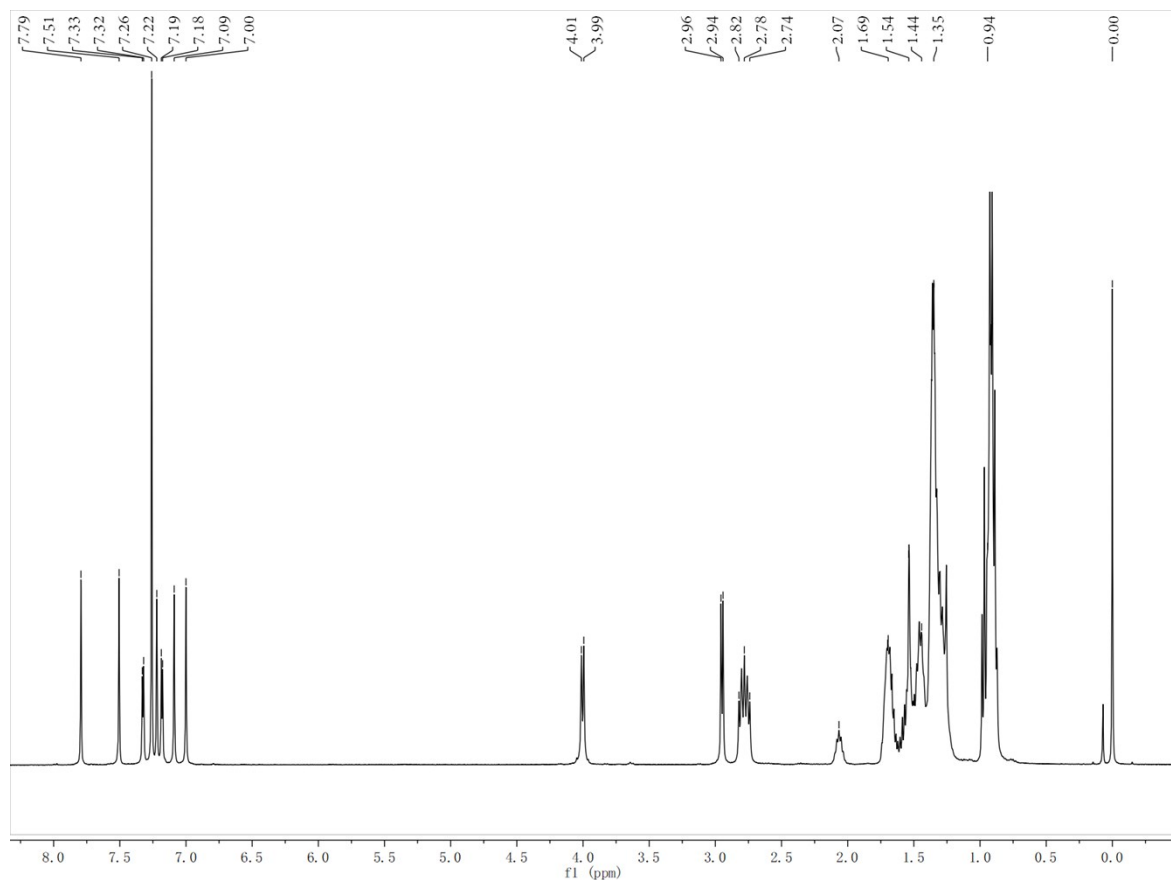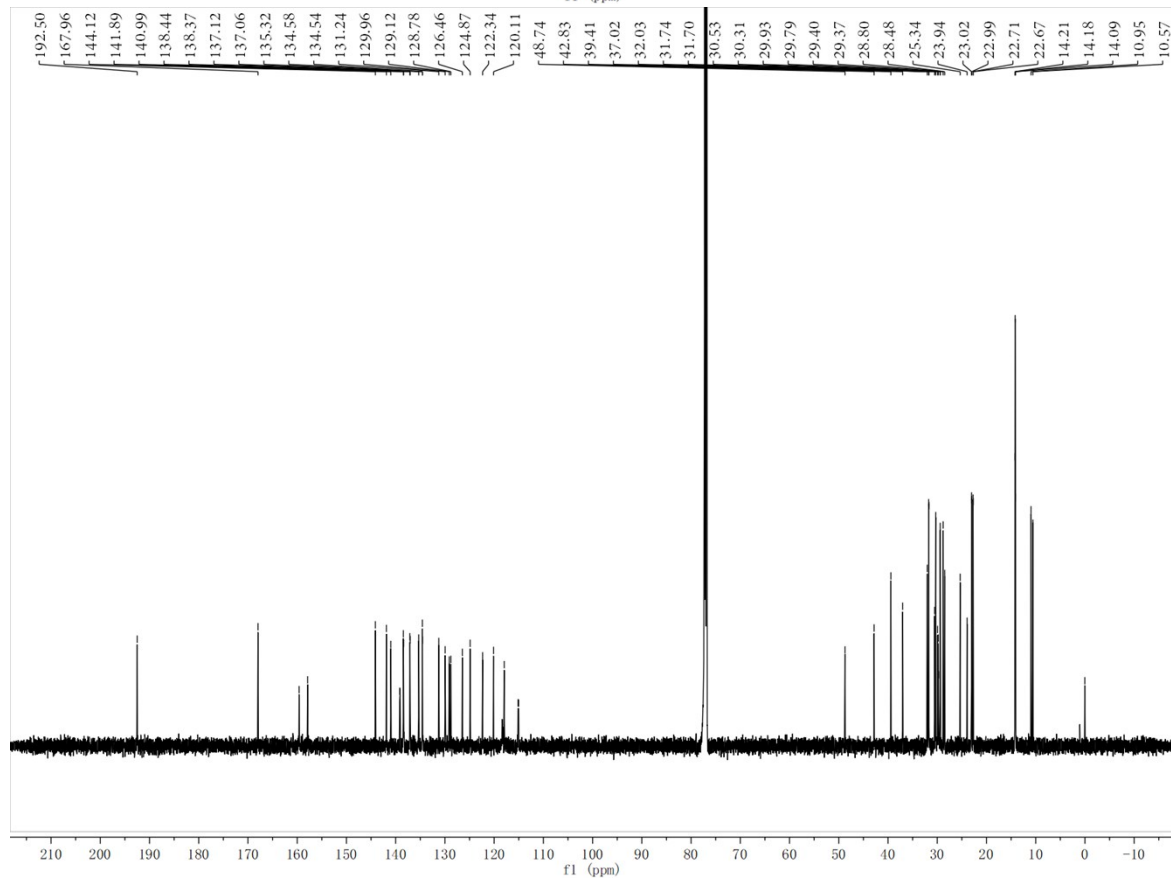

## REFERENCE

1. H. Wu; H. Fan; S. Xu; L. Ye; Y. Guo; Y. Yi; H. Ade; X. Zhu. *Small* 2019, **15**, e1804271.
2. Z. Li; G. He; X. Wan; Y. Liu; J. Zhou; G. Long; Y. Zuo; M. Zhang; Y. Chen. *Adv. Energy Mater.* 2012, **2**, 74.
